# Supplementary material for: Recovery of solid sulfur from hydrogen sulfide gas by an electrochemical membrane cell
Source: Royal Society of Chemistry journal article supplement (doi:10.1039/c5ra19116e), 2015-12-01
Supplement: c5ra19116e1.pdf [file c5ra19116e1.pdf]

## Electronic Supplementary Information (ESI)

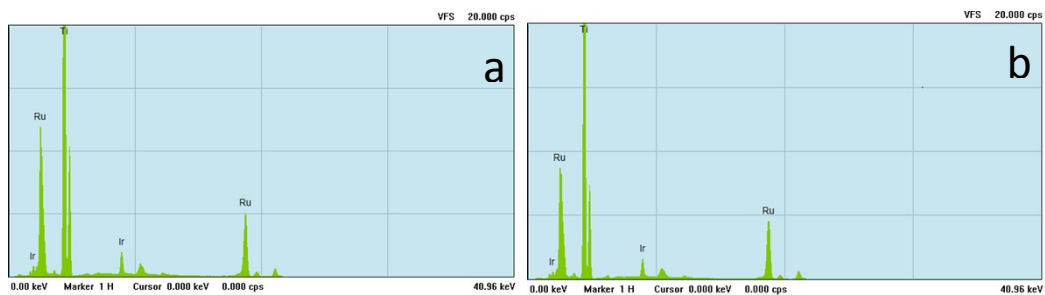

Fig. S1 – XRF image of standard (a) and flattened (b)

Chemical composition were same for standard mesh and flattened mesh (Ti/TiO<sub>2</sub>-RuO<sub>2</sub>-IrO<sub>2</sub>) both are same chemical composition.

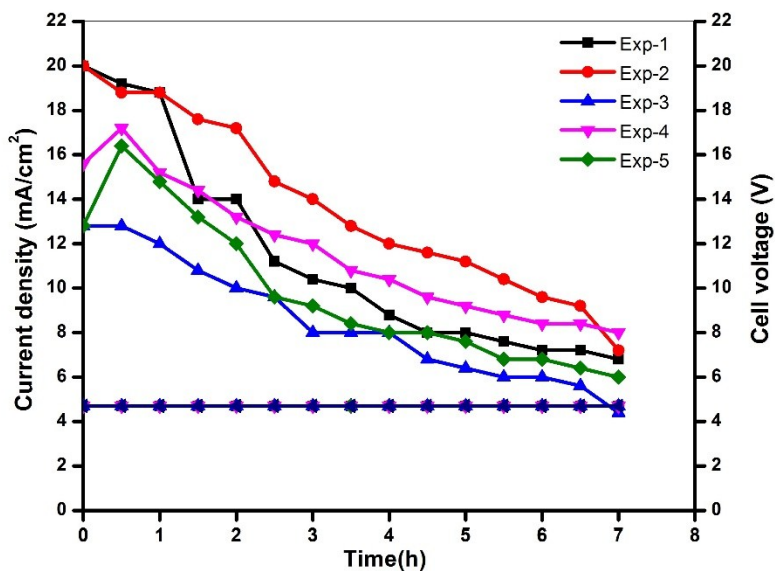

Fig. S2- System II –Consecutive experiment of standard electrode used for five cycles

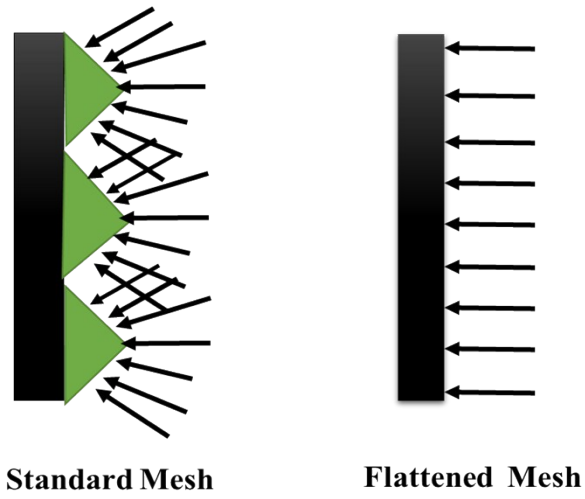

**Fig. S3-** Current distribution on standard and flattened (TSIA) electrode mesh.
